1 **Cost-effectiveness of testing for *Mycoplasma genitalium* among men who have sex with**  
2 **men in Australia**

3

4 Jason J. Ong<sup>1,2,3</sup>, Aaron G. Lim<sup>4</sup>, Catriona S. Bradshaw<sup>1</sup>, David Taylor-Robinson<sup>5</sup>, Magnus  
5 Unemo<sup>6,7</sup>, Patrick J. Horner<sup>4</sup>, Peter Vickerman<sup>4</sup>, Lei Zhang<sup>1,3,8</sup>

6

7 1. Central Clinical School, Monash University, Melbourne 3004, Australia

8 2. Faculty of Infectious and Tropical Diseases, London School of Hygiene and Tropical  
9 Medicine, London WC1E 7HT, United Kingdom

10 3. China-Australia Joint Research Center for Infectious Diseases, School of Public Health,  
11 Xi'an Jiaotong University Health Science Center, Xi'an, Shaanxi 710061, PR China.

12 4. Population Health Sciences, Bristol Medical School, University of Bristol, Bristol BS8  
13 1TH, United Kingdom

14 5. Faculty of Medicine, Imperial College London, London SW7 2BX, United Kingdom

15 6. WHO Collaborating Centre for Gonorrhoea and other STIs, Örebro University, Örebro 702  
16 81, Sweden

17 7. Institute for Global Health, University College London, London WC1E 6BT, United  
18 Kingdom

19 8. Artificial Intelligence and Modelling in Epidemiology Program, Melbourne Sexual Health  
20 Centre, Alfred Health, Melbourne 3053, Australia

21

22 **CORRESPONDING AUTHOR:**

23 Jason J. Ong

24 580 Swanston Street

25 Carlton, Victoria 3053, Australia

26 Phone: +613 9341 6200

27 Email: [Jason.Ong@monash.edu](mailto:Jason.Ong@monash.edu)

28

29 **Running title:** Cost-effectiveness of testing for MG

30 **Word count:** Abstract (236), Main text (2285)

31

32

## 33 KEY MESSAGES

- 34 • **What is already known on this topic** - *Mycoplasma genitalium* (MG) is a sexually  
35 transmitted pathogen with rising antimicrobial resistance.
- 36 • **What this study adds** - This economic evaluation found that testing only  
37 symptomatic men who have sex with men (MSM) is the most cost-effective option.  
38 When the costs per antibiotic consumed is greater than \$150, any testing for MG is no  
39 longer cost-effective.
- 40 • **How this study might affect research, practice or policy** - Among testing strategies  
41 for MSM, testing for MG should be restricted to symptomatic men only.

42

## 43 ABSTRACT

### 44 Objectives

45 *Mycoplasma genitalium* (MG) disproportionately affects men who have sex with men (MSM).  
46 We determined the cost-effectiveness of testing strategies for MG using a healthcare provider  
47 perspective.

### 48 Methods

49 We used inputs from a dynamic transmission model of MG among MSM living in Australia  
50 in a decision tree model to evaluate the impact of four testing scenarios on MG incidence: 1)  
51 no one tested; 2) symptomatic MSM; 3) symptomatic and high-risk asymptomatic MSM; 4)  
52 all MSM. We calculated the incremental cost-effectiveness ratios (ICERs) using a willingness  
53 to pay threshold of \$30,000 AUD per QALY gained. We explored the impact of adding an  
54 AMR tax (i.e. additional cost per antibiotic consumed) to identify the threshold whereby any  
55 testing for MG is no longer cost-effective.

### 56 Results

57 Testing only symptomatic MSM is the most cost-effective (ICER \$3,677 per QALY gained)  
58 approach. Offering testing to all men is dominated (i.e. not recommended because of higher

59 costs and lower QALYs gained compared to other strategies). When the AMR tax was above  
60 \$150, any testing for MG was no longer cost-effective.

### 61 **Conclusion**

62 Testing only symptomatic MSM is the most cost-effective option even when the potential  
63 costs associated with AMR are accounted for (up to \$150 additional cost per antibiotic  
64 consumed). For pathogens like MG where there are anticipated future costs related to AMR,  
65 we recommend models to test the impact of incorporating these costs as they can change the  
66 conclusions of cost-effectiveness studies.

67

68 **Keywords:** *Mycoplasma genitalium*, sexually transmitted infection, economic evaluation,  
69 antimicrobial resistance, screening

70

71 **INTRODUCTION**

72 *Mycoplasma genitalium* (MG) is a sexually transmitted bacterium that can cause urethritis,  
73 cervicitis, endometritis, and pelvic inflammatory disease.<sup>1</sup> A recent systematic review  
74 estimates that MG prevalence is 1.3% (95% CI: 1.0-1.8) among the asymptomatic general  
75 population in countries with higher Human Development Index (HDI) levels and 3.9% (95%  
76 CI: 2.2-6.7) in countries with lower HDI levels.<sup>2</sup> Of concern, there is a high and rising  
77 prevalence of antimicrobial resistance (AMR) in MG globally.<sup>3</sup>

78

79 Studies in men who have sex with men (MSM) have reported a higher prevalence of MG  
80 compared to the general population. For example, in a study of 1001 asymptomatic MSM  
81 attending a sexual health clinic in Australia, a prevalence of 9.5% was reported.<sup>4</sup> However,  
82 although MG may cause urethritis and proctitis in MSM,<sup>1,5</sup> there are no reproductive sequelae  
83 as in women.<sup>6</sup> Consequently, besides treating MG in MSM to alleviate symptoms, there is  
84 uncertainty over the benefits of testing for MG in achieving population-level control among  
85 MSM.

86

87 Testing asymptomatic individuals for MG is not recommended in the Australian, European,  
88 British and US MG management guidelines.<sup>7-10</sup> This recommendation is currently based on  
89 expert opinion. There is a lack of evidence regarding the benefits of testing and treating for  
90 MG among asymptomatic individuals, and no cost-effectiveness analysis has been published.

91

92 In this study, we aim to determine the cost-effectiveness of testing for MG using a healthcare  
93 provider perspective among MSM living in Australia. We evaluated the cost-effectiveness of  
94 testing: 1) no one; 2) only symptomatic MSM (current recommendation); 3) symptomatic and  
95 high-risk asymptomatic MSM; 4) all MSM. To account for the potential economic impact of

96 future antimicrobial resistant MG, we also imposed an AMR tax to explore whether this  
97 would alter the cost-effectiveness of testing strategies. As the future cost of AMR is complex  
98 and uncertain, it is challenging to monetize the direct and indirect consequences of AMR, let  
99 alone the costs for developing new antibiotics.<sup>11</sup> So, we adopted the approach used by the  
100 World Health Organization in the 2021 Guidelines for the management of symptomatic  
101 sexually transmitted infections, in their development of the vaginal discharge management  
102 algorithm.<sup>12</sup> The AMR tax is applied at the point of antibiotic use, and is a way to incorporate  
103 the detrimental effects of AMR into the net present value of the interventions under  
104 consideration.<sup>13</sup>

105

## 106 **METHODS**

### 107 *Costs*

108 A micro-costing approach was used to identify costs from an Australian healthcare provider  
109 perspective for testing and managing MG. The direct medical economic costs of testing and  
110 management were collated from the Australian Pharmaceutical Benefits Scheme and data  
111 from Melbourne Sexual Health Centre (MSHC), the largest publicly funded sexual health  
112 centre in Australia. We accounted for costs related to the medical consultation, tests and  
113 antibiotics used. The type of antibiotics used to manage MG infection was based on the  
114 current management guidelines at MSHC (Table 1) and the European guidelines<sup>10</sup> (as part of  
115 our sensitivity analysis). All costs are reported in Australian dollars (2021 AUD). A gamma  
116 distribution was used to characterise the uncertainty for costs (based on +/- 30% of the base-  
117 case estimate) in the probabilistic sensitivity analysis.

118

119 The initial cost of testing includes one consultation and one test. If an individual tests positive  
120 for MG, he will incur extra costs related to two additional consultations: one consultation for

121 receiving treatment, and one consultation for the test of cure. The antibiotics prescribed will  
122 depend on whether the MG strain is macrolide-susceptible or -resistant (Table 2). We  
123 evaluated how adding an AMR tax (ranging from 0 to \$200) would affect the cost-  
124 effectiveness of testing strategies. There is no single willingness to pay (WTP) threshold in  
125 Australia, although there is evidence that medicines are more likely to be recommended for  
126 listing with an ICER around \$30,000 than above \$70,000.<sup>14</sup> We used the more conservative  
127 WTP of \$30,000 per QALY gained in the analysis, but also provide the probability of being  
128 cost-effective across a range of WTP in the cost-effectiveness acceptability curves.

129

### 130 *Model*

131 We created a decision tree model in TreeAgePro 2021 (TreeAge Software, Williamstown,  
132 MA, USA) for four testing scenarios: 1) no one tested; 2) only symptomatic MSM tested (the  
133 current recommendation); 3) symptomatic and high-risk asymptomatic MSM tested; 4) all  
134 MSM tested. We defined high-risk men as those who reported more than ten sexual partners  
135 in the last six months.<sup>15</sup> Figure 1 presents the structure of one testing scenario, which is  
136 applied to all four scenarios in the final model. We used this decision tree model to calculate  
137 the total cost, total QALYs gained and incremental cost-effectiveness ratio for the four testing  
138 scenarios using estimates from a dynamic transmission model of MG among MSM living in  
139 Australia that we previously developed.<sup>16</sup> This dynamic transmission model simulated a  
140 cohort of MSM who could be infected with wild-type or macrolide-resistant MG. The  
141 dynamic model assumes: 1) a closed cohort of MSM (i.e. no transmission between MSM and  
142 non-MSM groups, and no births or deaths were incorporated); 2) a treatment effectiveness of  
143 92-95% using resistance-guided therapy;<sup>17</sup> 3) no transitions between low- and high-risk men,  
144 but sexual mixing can occur between the two populations; 4) the transmission rate is

145 independent of symptom status and the type of MG strain; and 5) 77% of those diagnosed  
146 would receive treatment.<sup>5</sup>

147

#### 148 *Model inputs*

149 There are limited data for utility weights related to MG (eTable 1). For men with  
150 complications (defined as ongoing symptoms and anxiety associated with the infection), we  
151 assumed a utility weight of 0.96, which was based on 3 months with disutility weight of 0.16  
152 (based on urethritis).<sup>18</sup> For men receiving a positive MG test with a resistant strain, we  
153 assumed 100% had a disutility weight of 0.1 for the first month, 10% with disutility weight of  
154 0.1 in the second month, and 2% with disutility weight of 0.1 in the third month. These  
155 proportions were based on the clinical experience of sexual health clinicians at MSHC. For  
156 men receiving a positive MG test with a wild-type strain, we assumed 100% had a disutility  
157 weight of 0.05 for the first month. The probabilities of men having more than 10 partners in  
158 the last 6 months, proportion with ongoing symptoms, and proportion of men screened based  
159 on symptoms were derived from unpublished data from MSHC.

160

#### 161 *Sensitivity analyses*

162 To examine the impact of parameter uncertainty (eTable 2), we conducted one-way and  
163 probabilistic sensitivity analyses and present these as tornado plots and cost-effectiveness  
164 acceptability curves, respectively. A Monte Carlo simulation with 100,000 samples was run  
165 for the probabilistic sensitivity analysis. In secondary analyses, we tested the effect of a range  
166 of AMR tax (\$20 to \$200) on the cost-effectiveness acceptability curves, and to identify the  
167 threshold level of the AMR tax where any testing for MG is no longer cost-effective. We also  
168 explored a scenario whereby MG testing is conducted in three anatomical sites (eTable 3).

169



170 We report our findings using the Consolidated Health Economic Evaluation Reporting  
171 Standards 2022 (CHEERS 2022, Appendix).

172

## 173 **RESULTS**

### 174 *Primary cost-effectiveness analysis*

175 Table 3 summarizes the total and incremental cost and QALYs gained in a population of  
176 10,000 MSM. It shows that testing all men will always be dominated (i.e. not recommended  
177 because of high costs and lower QALYs gained compared to other strategies) regardless of  
178 the range of the AMR tax. Testing symptomatic MSM is cost-effective (ICER \$3,677 per  
179 QALY gained) compared to no testing. eFigure 1 summarizes the results from the  
180 probabilistic sensitivity analyses, demonstrating the probability of being cost-effective at the  
181 WTP threshold of \$30,000 was 40.7% for testing symptomatic MSM only.

182

### 183 *Secondary cost-effectiveness analyses: implementing an AMR tax*

184 eFigures 2 to 6 demonstrates the impact of increasing the AMR tax from \$20 to \$200. The  
185 strategy of not testing anyone becomes most cost-effective when the AMR tax is more than  
186 \$150.

187

### 188 *Sensitivity analyses*

189 The univariate sensitivity analysis results are shown in eFigures 7 to 9. The ICER for testing  
190 only symptomatic men (current recommendation) compared with no testing was most  
191 influenced by the probability of resistant MG in low-risk MSM, the AMR tax and disutility of  
192 MG complications. However, the ICERs remain below the willingness to pay threshold,  
193 suggesting that testing only symptomatic MSM is cost-effective compared to no testing. The  
194 ICER for testing only symptomatic men compared with testing both high-risk asymptomatic

195 men and symptomatic men was most influenced by AMR tax, the probability of wild-type  
196 MG in high-risk MSM and probability of wild-type MG. The ICER for testing only  
197 symptomatic men compared with testing all MSM was most influenced by the probability of  
198 resistant MG in low-risk MSM, the disutility of resistant MG and the AMR tax. However, all  
199 ICERs remain cost-saving, suggesting that testing only symptomatic MSM will always be  
200 cost-saving compared to testing all MSM. Testing three anatomical sites would increase total  
201 costs for each scenario but does not change our conclusions (eTable 3).

202

## 203 **DISCUSSION**

204 With increasing access to nucleic acid amplification tests for MG, it is important to ensure  
205 recommendations to test for MG are informed by robust evidence, including economic  
206 evaluations. Thus, our cost-effectiveness analysis provides evidence for the value in money  
207 for various testing strategies for an infection that is predominantly asymptomatic in MSM<sup>19</sup>,  
208 but has rising AMR.<sup>3,20</sup> Our findings strengthen the evidence base for the current  
209 international and national guidelines that recommend testing in symptomatic individuals  
210 only.<sup>7,8,21</sup>

211

212 The current recommendation to test for MG among symptomatic individuals with specific  
213 indications is an example of antibiotic stewardship. Overuse of antibiotics has been linked to  
214 rising resistance in many pathogens<sup>22</sup> and specifically for MG, countries with a higher  
215 background of macrolide use has been associated with higher prevalence of macrolide-  
216 resistant MG.<sup>23,24</sup> Thus, restricting antibiotics only for symptomatic MSM minimizes  
217 antibiotic consumption in a population that already receives far more antibiotics than the  
218 general population.<sup>25</sup> Screening asymptomatic men for MSM is problematic on a number of  
219 levels. There are no data to suggest asymptomatic MG in MSM is posing a significant risk to

220 health and, due to rising AMR, management of MG is becoming increasingly complex and  
221 costly, with challenges in accessing second- or third-line antibiotics outside of specialist  
222 sexual health services. Further, we need to consider the harms associated with screening  
223 asymptomatic MSM, including the psychological morbidity of being diagnosed with an  
224 asymptomatic infection that is unlikely to cause complications among MSM but is  
225 increasingly hard to cure and subjects individuals to repeated and often long courses of  
226 antibiotics.

227

228 There are increasing reports of the rapid spread of macrolide-resistant MG and the emergence  
229 of fluoroquinolone resistance globally.<sup>3</sup> Where suboptimal treatment regimens are prescribed  
230 (particularly in the context of rising macrolide resistance), offering MG testing might lead to  
231 increases in macrolide-resistant MG.<sup>16</sup> This phenomenon is also observed for malaria<sup>26</sup> and  
232 tuberculosis.<sup>27</sup> Subtherapeutic or subinhibitory antibiotic concentrations can promote the  
233 development of AMR in not only the target organism but also in other pathogens and  
234 commensals.<sup>28</sup> Consistent with this, in settings with greater use of macrolides, there is a  
235 higher prevalence of macrolide-resistant MG.<sup>29</sup> This stresses the urgency of implementing  
236 resistance-guided therapy for MG to ensure that the most appropriate antibiotic is selected for  
237 eliminating the pathogen.<sup>17</sup>

238

239 Since the advent of antibiotics, we have observed that the effectiveness of antibiotics  
240 generally wanes over time against most pathogens, particularly when there is over-  
241 consumption. Thus, economic models should account for costs related to the development  
242 and spread of AMR.<sup>30,31</sup> Currently, very few models explicitly account for the future costs of  
243 AMR.<sup>32</sup> Most studies include direct health costs but do not consider non-health perspectives  
244 (e.g. societal impact).<sup>32</sup> There remains no consensus of how best to capture these costs.

245 Importantly, future costs should also include treating sequelae that arise from untreatable  
246 infections (including prolonged hospitalization), the need to use increasingly toxic and costly  
247 antibiotics, and the development of new antibiotics to combat infection. While it may not be  
248 feasible to accurately capture these specific cost items, the strength of our approach to use an  
249 AMR tax would incorporate these components to explicitly demonstrate the impact of AMR  
250 on present decision-making. However, a limitation is that we could not disaggregate the  
251 direct and indirect costs associated with AMR, nor account for the unmeasured impact on  
252 other bacteria and the microbiome in the setting of antibiotic overconsumption.

253

254 The strength of our study is the use of inputs from a dynamic transmission model for MG to  
255 evaluate the cost-effectiveness of a variety of testing strategies for MSM. Given the  
256 importance of AMR for MG, we also explored the impact of incorporating potential costs of  
257 AMR in our models. Our study should be read in light of some limitations. First, our model  
258 calculates the incidence at equilibrium with inputs from the transmission dynamic model;  
259 thus, we do not have data on how quickly equilibrium is reached. Second, our findings are  
260 specifically for MSM and not for heterosexual populations. The disutility from reproductive  
261 morbidity associated with MG will need to be accounted for in future studies in heterosexual  
262 populations. Third, the AMR profile of MG varies markedly depending on the country and  
263 population,<sup>3</sup> so we recommend context-specific economic evaluations that also account for  
264 locally-derived health and AMR costs. Fourth, there is no consensus on an acceptable  
265 threshold for an AMR tax, but we recommend that future models incorporate this as part of  
266 their sensitivity analyses given AMR's significant impact on both cost and effectiveness.<sup>33</sup>  
267 Last, due to absence of data, several model inputs were based on assumptions. Our univariate  
268 sensitivity analyses highlight the parameters that would most likely change the ICER of the  
269 testing strategy, and thus would benefit from more accurate measurements in future models.

270

271 In conclusion, our study confirms that the current recommendation for MG testing, i.e. testing  
272 only symptomatic MSM, is the most cost-effective option in an Australian context. This  
273 conclusion remains robust despite uncertainties in multiple parameters, including accounting  
274 for future costs of AMR.

275

276

### 277 **FUNDING**

278 This work was supported by the Australian National Health and Medical Research Council  
279 Emerging Leader Fellowship (GNT1193955).

280

### 281 **COMPETING INTERESTS**

282 All authors declare no conflict of interests.

283

### 284 **CONTRIBUTORSHIP**

285 JO, LZ conceived the research idea. JO, AGL, PV and LZ constructed the dynamic  
286 transmission model and conducted the economic evaluation. JO drafted the first manuscript.

287 All authors contributed to the writing of the paper and approve the final version.

288

### 289 **PATIENT AND PUBLIC INVOLVEMENT**

290 Patients or the public were not involved in the design, or conduct, or reporting, or  
291 dissemination plans of our research.

292

### 293 **DATA AVAILABILITY**

294 All data produced in the present work are contained in the manuscript.

295

296 **REFERENCES**

- 297 1. Taylor-Robinson D, Jensen JS. Mycoplasma genitalium: from Chrysalis to  
298 multicolored butterfly. *Clin Microbiol Rev.* 2011;24(3):498-514.
- 299 2. Baumann L, Cina M, Egli-Gany D, et al. Prevalence of Mycoplasma genitalium in  
300 different population groups: systematic review and meta-analysis. *Sex Transm Infect.*  
301 2018;94(4):255-262.
- 302 3. Machalek DA, Tao Y, Shilling H, et al. Prevalence of mutations associated with  
303 resistance to macrolides and fluoroquinolones in Mycoplasma genitalium: a  
304 systematic review and meta-analysis. *Lancet Infect Dis.* 2020;20(11):1302-1314.
- 305 4. Read TRH, Murray GL, Danielewski JA, et al. Symptoms, Sites, and Significance of  
306 Mycoplasma genitalium in Men Who Have Sex with Men. *Emerg Infect Dis.*  
307 2019;25(4):719-727.
- 308 5. Ong JJ, Aung E, Read TRH, et al. Clinical Characteristics of Anorectal Mycoplasma  
309 genitalium Infection and Microbial Cure in Men Who Have Sex With Men. *Sex*  
310 *Transm Dis.* 2018;45(8):522-526.
- 311 6. Wiesenfeld HC, Manhart LE. Mycoplasma genitalium in Women: Current  
312 Knowledge and Research Priorities for This Recently Emerged Pathogen. *J Infect Dis.*  
313 2017;216(suppl\_2):S389-S395.
- 314 7. Soni S, Horner P, Rayment M, et al. British Association for Sexual Health and HIV  
315 national guideline for the management of infection with Mycoplasma genitalium  
316 (2018). *Int J STD AIDS.* 2019;30(10):938-950.
- 317 8. Australian sexually transmitted infections management guidelines for use in primary  
318 care. The Australian Government Department of Health.  
319 <http://www.sti.guidelines.org.au/>. Accessed 21st April 2017.
- 320 9. US Centers for Disease Control and Prevention. Sexually Transmitted Infections  
321 Treatment Guidelines, 2021. Mycoplasma genitalium.  
322 <https://www.cdc.gov/std/treatment-guidelines/mycoplasmagenitalium.htm>. Accessed  
323 23rd November 2021.
- 324 10. Jensen JS, Cusini M, Gomberg M, Moi H, Wilson J, Unemo M. 2021 European  
325 guideline on the management of Mycoplasma genitalium infections. *J Eur Acad*  
326 *Dermatol Venereol.* 2022.
- 327 11. Naylor NR, Atun R, Zhu N, et al. Estimating the burden of antimicrobial resistance: a  
328 systematic literature review. *Antimicrob Resist Infect Control.* 2018;7:58.
- 329 12. World Health Organization. Guidelines for the management of sexually transmitted  
330 infections.  
331 [https://www.who.int/hiv/topics/vct/sw\\_toolkit/guidelines\\_management\\_sti.pdf?ua=1](https://www.who.int/hiv/topics/vct/sw_toolkit/guidelines_management_sti.pdf?ua=1).  
332 Accessed 13th Feb 2021.
- 333 13. Shrestha P, Cooper BS, Coast J, et al. Enumerating the economic cost of antimicrobial  
334 resistance per antibiotic consumed to inform the evaluation of interventions affecting  
335 their use. *Antimicrob Resist Infect Control.* 2018;7:98.
- 336 14. Australian Government Department of Health and Aged Care. The effects of statutory  
337 price reductions on the listing of new medicines.  
338 <https://www.pbs.gov.au/info/general/working-groups/amwg/amwg-interim-report-attachment-#:~:text=While%20there%20is%20no%20single,with%20an%20ICER%20above%200%2470%2C000>. Accessed 4th August 2022.

- 342 15. STI's in Gay Men Action Group (STIGMA). Sexual transmitted infection testing  
343 guidelines for men who have sex with men. STI's in Gay Men Action Group  
344 (STIGMA) Web site. 2014. [http://stipu.nsw.gov.au/wp-](http://stipu.nsw.gov.au/wp-content/uploads/STIGMA_Testing_Guidelines_Final_v5.pdf)  
345 [content/uploads/STIGMA\\_Testing\\_Guidelines\\_Final\\_v5.pdf](http://stipu.nsw.gov.au/wp-content/uploads/STIGMA_Testing_Guidelines_Final_v5.pdf). Published 2014.  
346 Accessed 31 Dec, 2015.
- 347 16. Ong JJ, Ruan L, Lim AG, et al. Impact of screening on the prevalence and incidence  
348 of Mycoplasma genitalium and its macrolide resistance in men who have sex with  
349 men living in Australia: A mathematical model. *EClinicalMedicine*. 2021;33:100779.
- 350 17. Read TRH, Fairley CK, Murray GL, et al. Outcomes of Resistance-guided Sequential  
351 Treatment of Mycoplasma genitalium Infections: A Prospective Evaluation. *Clin*  
352 *Infect Dis*. 2019;68(4):554-560.
- 353 18. Delany I, Rappuoli R, De Gregorio E. Vaccines for the 21st century. *EMBO Mol Med*.  
354 2014;6(6):708-720.
- 355 19. Couldwell DL, Jalocon D, Power M, Jeoffreys NJ, Chen SC, Lewis DA. Mycoplasma  
356 genitalium: high prevalence of resistance to macrolides and frequent anorectal  
357 infection in men who have sex with men in western Sydney. *Sex Transm Infect*.  
358 2018;94(6):406-410.
- 359 20. Li Y, Le WJ, Li S, Cao YP, Su XH. Meta-analysis of the efficacy of moxifloxacin in  
360 treating Mycoplasma genitalium infection. *Int J STD AIDS*. 2017;28(11):1106-1114.
- 361 21. Jensen JS, Cusini M, Gomberg M, Moi H. 2016 European guideline on Mycoplasma  
362 genitalium infections. *J Eur Acad Dermatol Venereol*. 2016;30(10):1650-1656.
- 363 22. Olesen SW, Barnett ML, MacFadden DR, et al. The distribution of antibiotic use and  
364 its association with antibiotic resistance. *Elife*. 2018;7.
- 365 23. Kenyon C, Manoharan-Basil SS. Macrolide consumption and resistance in  
366 Mycoplasma genitalium. *Lancet Infect Dis*. 2020;20(11):1235-1236.
- 367 24. Kenyon C, Manoharan-Basil SS, Van Dijck C. Is There a Resistance Threshold for  
368 Macrolide Consumption? Positive Evidence from an Ecological Analysis of  
369 Resistance Data from Streptococcus pneumoniae, Treponema pallidum, and  
370 Mycoplasma genitalium. *Microb Drug Resist*. 2021;27(8):1079-1086.
- 371 25. Kenyon C, Baetselier I, Wouters K. Screening for STIs in PrEP cohorts results in high  
372 levels of antimicrobial consumption. *Int J STD AIDS*. 2020;31(12):1215-1218.
- 373 26. Wang J, Xu C, Liao FL, Jiang T, Krishna S, Tu Y. Suboptimal dosing triggers  
374 artemisinin partner drug resistance. *Lancet Infect Dis*. 2019;19(11):1167-1168.
- 375 27. Kempker RR, Kipiani M, Mirtskhulava V, Tukvadze N, Magee MJ, Blumberg HM.  
376 Acquired Drug Resistance in Mycobacterium tuberculosis and Poor Outcomes among  
377 Patients with Multidrug-Resistant Tuberculosis. *Emerg Infect Dis*. 2015;21(6):992-  
378 1001.
- 379 28. Viswanathan VK. Off-label abuse of antibiotics by bacteria. *Gut Microbes*.  
380 2014;5(1):3-4.
- 381 29. Pitt R, Unemo M, Sonnenberg P, et al. Antimicrobial resistance in Mycoplasma  
382 genitalium sampled from the British general population. *Sex Transm Infect*.  
383 2020;96(6):464-468.
- 384 30. Niewiadomska AM, Jayabalasingham B, Seidman JC, et al. Population-level  
385 mathematical modeling of antimicrobial resistance: a systematic review. *BMC Med*.  
386 2019;17(1):81.
- 387 31. Birkegard AC, Halasa T, Toft N, Folkesson A, Graesboll K. Send more data: a  
388 systematic review of mathematical models of antimicrobial resistance. *Antimicrob*  
389 *Resist Infect Control*. 2018;7:117.
- 390 32. Gandra S, Barter DM, Laxminarayan R. Economic burden of antibiotic resistance:  
391 how much do we really know? *Clin Microbiol Infect*. 2014;20(10):973-980.

- 392 33. O'Neill J. Tackling drug resistant infections globally: final report and  
393 recommendations. [https://amr-](https://amr-review.org/sites/default/files/160518_Final%20paper_with%20cover.pdf)  
394 [review.org/sites/default/files/160518\\_Final%20paper\\_with%20cover.pdf](https://amr-review.org/sites/default/files/160518_Final%20paper_with%20cover.pdf). Accessed  
395 1st Feb 2019.
- 396 34. Australian Government Department of Health. The Pharmaceutical Benefits Scheme.  
397 <https://www.pbs.gov.au/pbs/home>. Accessed 20th August 2021.
- 398 35. Medicare Benefits Schedule.  
399 [www.health.gov.au/internet/mbsonline/publishing.nsf/Content/Medicare-Benefits-](http://www.health.gov.au/internet/mbsonline/publishing.nsf/Content/Medicare-Benefits-Schedule-MBS-1)  
400 [Schedule-MBS-1](http://www.health.gov.au/internet/mbsonline/publishing.nsf/Content/Medicare-Benefits-Schedule-MBS-1). Accessed 10th July 2014.
- 401 36. Melbourne Sexual Health Centre. Mycoplasma genitalium treatment guidelines.  
402 [https://www.mshc.org.au/health-professionals/treatment-guidelines/mycoplasma-](https://www.mshc.org.au/health-professionals/treatment-guidelines/mycoplasma-genitalium-treatment-guidelines)  
403 [genitalium-treatment-guidelines](https://www.mshc.org.au/health-professionals/treatment-guidelines/mycoplasma-genitalium-treatment-guidelines). Accessed 24th Feb 2022.  
404
- 405



406 **TABLES**

407 **Table 1 The direct health costs of managing a patient diagnosed with macrolide-resistant *Mycoplasma genitalium* using antibiotics recommended at Melbourne**  
 408 **Sexual Health Centre, and the European guidelines.**

409

|                                         | Initial treatment (100%)                                                                                | Test of cure | Failed 1 <sup>st</sup> line<br>(10%)                                                                                                                      | Test of cure | Failed 2 <sup>nd</sup> line<br>(2%)                                                                                                                                   | Test of cure |
|-----------------------------------------|---------------------------------------------------------------------------------------------------------|--------------|-----------------------------------------------------------------------------------------------------------------------------------------------------------|--------------|-----------------------------------------------------------------------------------------------------------------------------------------------------------------------|--------------|
| <b>Melbourne Sexual Health Centre</b>   |                                                                                                         |              |                                                                                                                                                           |              |                                                                                                                                                                       |              |
| Antibiotics                             | Doxycycline 100 mg bd 7 days (\$35.72)<br>followed by<br>Moxifloxacin 400 mg daily for 7 days (\$86.10) |              | Doxycycline 100 mg bd 7 days (\$35.72)<br>followed by<br>Combination Doxycycline 100 mg bd<br>daily (\$35.72) + Sifloxacin 100 mg bd<br>7 days (\$145.04) |              | Combination Doxycycline<br>100 mg bd 10 days (\$71.44)<br>+ Pristinamycin 1 g tds 10<br>days (\$182.81)<br>OR<br>Minocycline 100 mg 14<br>days <sup>1</sup> (\$22.53) |              |
| Consultation                            | \$38.75                                                                                                 | \$38.75      | \$38.75                                                                                                                                                   | \$38.75      | \$38.75                                                                                                                                                               | \$38.75      |
| Test                                    |                                                                                                         | \$39.65      |                                                                                                                                                           | \$39.65      |                                                                                                                                                                       | \$39.65      |
| <b>European Guidelines<sup>10</sup></b> |                                                                                                         |              |                                                                                                                                                           |              |                                                                                                                                                                       |              |
| Antibiotics                             | Moxifloxacin 400 mg daily for 7 days (\$86.10)                                                          |              | Pristinamycin 1 g four times daily for 10<br>days (\$182.81)                                                                                              |              | Minocycline 100 mg two<br>times daily for 14 days                                                                                                                     |              |

|              |         |         |         |         |           |         |
|--------------|---------|---------|---------|---------|-----------|---------|
|              |         |         |         |         | (\$22.53) |         |
| Consultation | \$38.75 | \$38.75 | \$38.75 | \$38.75 | \$38.75   | \$38.75 |
| Test         |         | \$39.65 |         | \$39.65 |           | \$39.65 |

410 <sup>1</sup>Based on MSHC data, we estimate that 70% would use minocycline

411 **Table 2 Cost (AUD) model input parameters**

| Cost parameter                                                                   | Cost (\$) | Gamma distribution<br>(alpha, lambda) | Reference and assumptions                                 |
|----------------------------------------------------------------------------------|-----------|---------------------------------------|-----------------------------------------------------------|
| Doctor's consultation                                                            | 38.75     | 11.1, 0.29                            | PBS <sup>34</sup>                                         |
| Test for MG (including test for macrolide resistance)                            | 39.65     | 11.1, 0.28                            | MBS <sup>35</sup> + \$11 for resistance test <sup>1</sup> |
| Azithromycin 1g stat then 500 mg daily for another 3 days                        | 67.68     | -                                     | PBS <sup>34</sup>                                         |
| Doxycycline 100 mg twice daily for 1 week                                        | 35.72     | -                                     | PBS <sup>34</sup>                                         |
| Moxifloxacin 400 mg daily for 7 days                                             | 86.10     | -                                     | MSHC <sup>36</sup>                                        |
| Pristinamycin 1g three times a day for 10 days                                   | 182.81    | -                                     | MSHC <sup>36</sup>                                        |
| Minocycline 100 mg twice daily for 14 days                                       | 22.53     | -                                     | PBS <sup>34</sup>                                         |
| Sitafloxacin 100 mg twice daily for 7 days                                       | 145.04    | -                                     | MSHC <sup>36</sup>                                        |
| Cost of antibiotics for treating wild type (MSHC) <sup>2</sup>                   | 103.40    | 11.1, 0.11                            | PBS <sup>34</sup>                                         |
| Cost of antibiotics for treating wild type (European guidelines)                 | 67.68     | 11.1, 0.16                            | <sup>10</sup>                                             |
| Cost of antibiotics for treating resistant MG (MSHC)                             | 147.45    | 11.1, 0.08                            | PBS <sup>34</sup>                                         |
| Cost of antibiotics for treating resistant MG <sup>2</sup> (European guidelines) | 104.83    | 11.1, 0.11                            | <sup>10</sup>                                             |

412 <sup>1</sup> Discussion with local laboratory (September 2021)

413 <sup>2</sup> Based on Doxycycline 100 mg bd 1 week followed by Azithromycin 1 g stat, then 500 mg daily for another 3 days

414 AUD = Australian dollars, MBS = Medicare Benefits Schedule; MG = *Mycoplasma genitalium*; MSHC = Melbourne Sexual Health Centre;

415 PBS = Pharmaceutical Benefits Scheme

416

417 **Table 3 Cost-effectiveness of testing for *Mycoplasma genitalium* among 10,000 men who have sex with**  
 418 **men, according to various levels of AMR tax**

|                                                       | Cost      | Incremental<br>cost | QALY  | Incremental<br>QALY | ICER      |
|-------------------------------------------------------|-----------|---------------------|-------|---------------------|-----------|
| <b>\$0 AMR tax</b>                                    |           |                     |       |                     |           |
| No one is tested                                      | 0         |                     | 9,970 |                     |           |
| Testing only symptomatic MSM (current recommendation) | 11,032    | 11,032              | 9,973 | 3                   | 3,677     |
| Testing symptomatic and high-risk asymptomatic MSM    | 103,495   | 92,463              | 9,975 | 2                   | 46,232    |
| Testing all MSM                                       | 1,417,606 | 1,314,111           | 9,961 | -14                 | Dominated |
| <b>\$20 AMR tax</b>                                   |           |                     |       |                     |           |
| No one is tested                                      | 0         |                     | 9,970 |                     |           |
| Testing only symptomatic MSM (current recommendation) | 15,939    | 15,939              | 9,973 | 3                   | 5,313     |
| Testing symptomatic and high-risk asymptomatic MSM    | 116,265   | 100,326             | 9,975 | 2                   | 50,163    |
| Testing all MSM                                       | 1,463,541 | 1,347,276           | 9,961 | -14                 | Dominated |
| <b>\$50 AMR tax</b>                                   |           |                     |       |                     |           |
| No one is tested                                      | 0         |                     | 9,970 |                     |           |
| Testing only symptomatic MSM (current recommendation) | 23,300    | 23,300              | 9,973 | 3                   | 7,767     |
| Testing symptomatic and high-risk asymptomatic MSM    | 135,419   | 112,119             | 9,975 | 2                   | 56,060    |
| Testing all MSM                                       | 1,532,443 | 1,397,024           | 9,961 | -14                 | Dominated |

419 AMR = antimicrobial resistance; ICER = incremental cost-effectiveness ratio; MSM = men who have sex with men; QALY = quality-  
 420 adjusted life years

421  
 422

423 **FIGURES**

424 **Figure 1. Decision tree model for the cost-effectiveness of testing for *Mycoplasma genitalium* among men**  
 425 **who have sex with men**

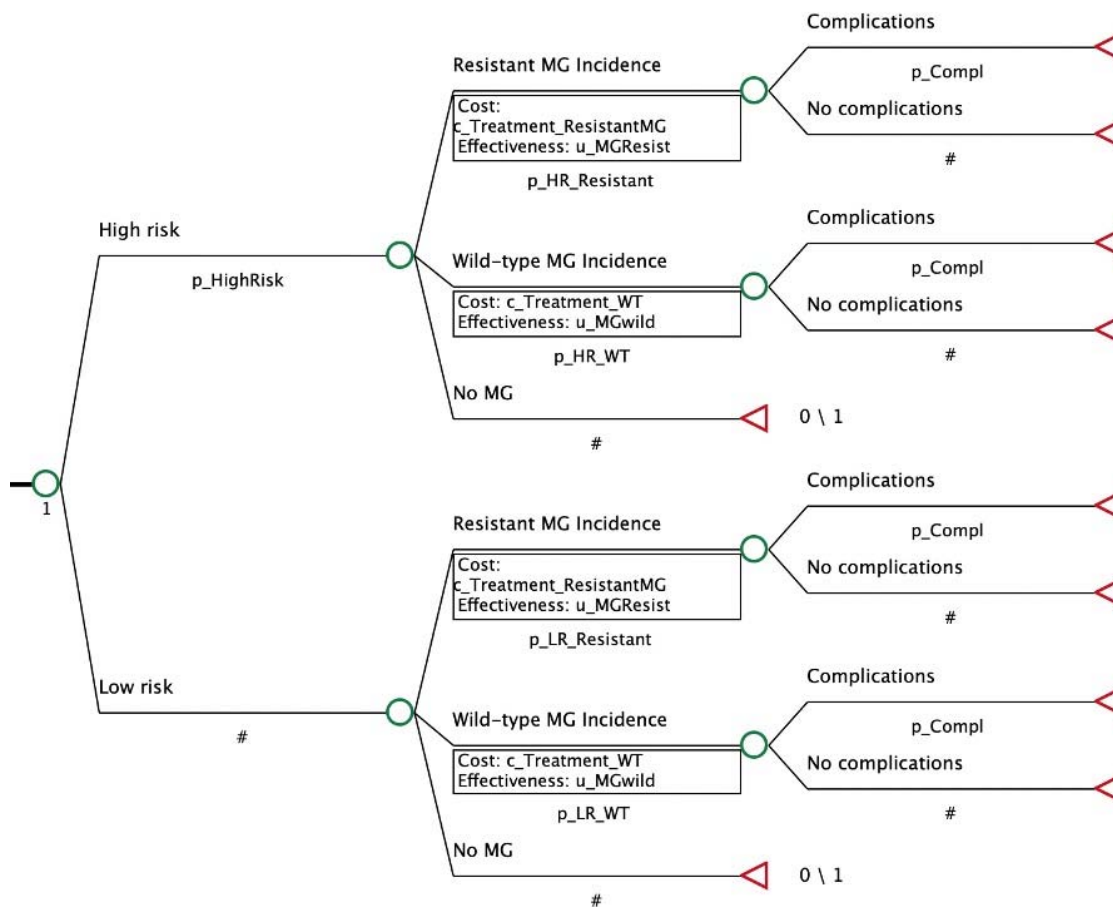

426

427

428  $p_{\text{HighRisk}}$  = probability of a men being at high-risk for *Mycoplasma genitalium* (MG)

429  $p_{\text{HR\_Resistant}}$  = probability that MG is resistant to macrolides for high-risk MSM

430  $p_{\text{HR\_WT}}$  = probability that MG is wild type for high-risk MSM

431  $p_{\text{LR\_Resistant}}$  = probability that MG is resistant to macrolides for low-risk MSM

432  $p_{\text{LR\_WT}}$  = probability that MG is wild type for low-risk MSM

433  $p_{\text{Compl}}$  = probability of complications related to MG

434 # =  $1 -$  other rates
